# Supplementary material
Source: PubMed Central journal article supplement (PMC2956942)
Supplement: tjp0588-3011-SD1.pdf [file tjp0588-3011-SD1.pdf]

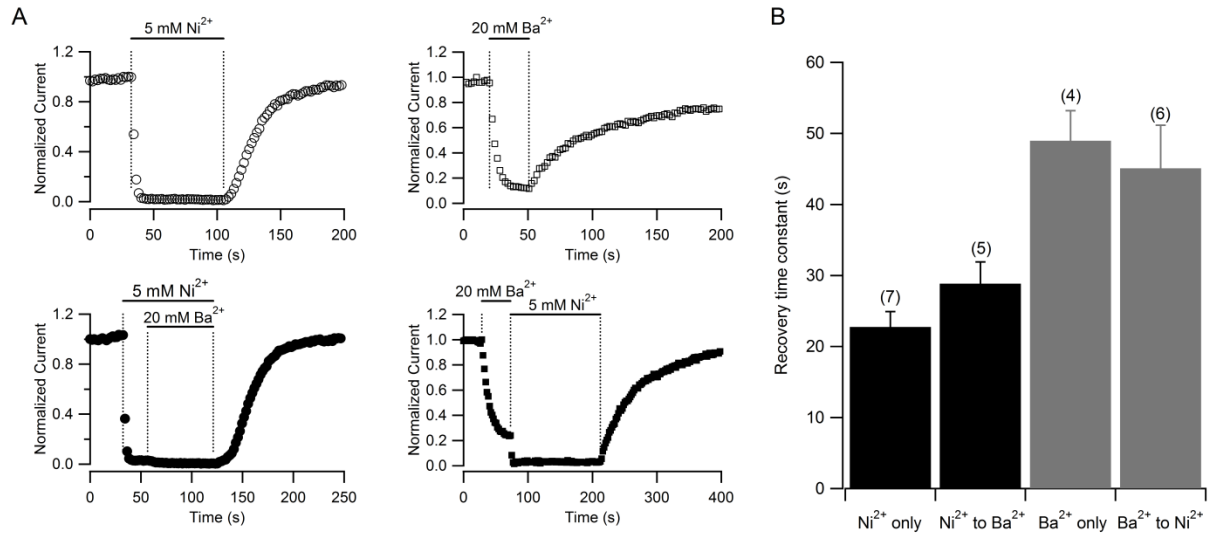

**Supplementary Figure 1. Ni<sup>2+</sup> prevents Ba<sup>2+</sup> entry and exit from the pore binding site.** **A**, Diary plots of normalized peak current amplitude measured using 15 ms pulses to +50 mV, applied at 0.5 Hz. Currents are normalized to the average control peak current amplitude at the beginning of each experiment, before test treatments. Each plot represents a separate experiment in a different cell. The durations of exposure to 5 mM Ni<sup>2+</sup> and/or 20 mM Ba<sup>2+</sup> are indicated by the horizontal bars at the top of each plot. **B**, Comparison of the time constants for recovery from exposure to Ni<sup>2+</sup> only; Ni<sup>2+</sup> followed by Ba<sup>2+</sup>; Ba<sup>2+</sup> only; and Ba<sup>2+</sup> followed by Ni<sup>2+</sup>. Ni<sup>2+</sup> prevents Ba<sup>2+</sup> from binding to Kv1.5 channels, resulting in a recovery time course from Ni<sup>2+</sup> followed by Ba<sup>2+</sup> that is not significantly different from recovery from Ni<sup>2+</sup> alone. Conversely, when Ba<sup>2+</sup> is applied first, it is trapped within the pore by subsequently applied Ni<sup>2+</sup>. This results in a recovery time course that is not significantly different from the recovery from Ba<sup>2+</sup> alone. Error bars represent S.E.M.; *n*-values for each data set are shown in parentheses.
